# Supplementary material for: Integrative analysis of genomic and transcriptomic characteristics associated with progression of aggressive thyroid cancer
Source: PubMed Central journal article supplement (PMC6591357; doi:10.1038/s41467-019-10680-5), 2019-06-24
Supplement: 41467_2019_10680_MOESM3_ESM.pdf [file 41467_2019_10680_MOESM3_ESM.pdf]

## **Description of Additional Supplementary Files**

File Name: Supplementary Data 1

Description: Variant detection concordance between WGS and targeted sequencing

File Name: Supplementary Data 2

Description: Patient information
